# Supplementary material for: Traditional Utilization of Weeds and Ethnic Ecological Wisdom in Longsheng Terraces—A Study Based on Globally Important Agricultural Heritage Systems
Source: Research Square preprint supplement (doi:10.21203/rs.3.rs-7378301/v1), 2025-08-26
Supplement: Supplementary file 1 [file 727198daff210f6403810928.xlsx]

## Sheet: Appendix A
Family	Scientific name	Chinese Name	Pinyin	Application category	Local name	Efficacy	Application mode	Use part	Invasion Level	Pharmacopoeia of People's Republic of China (2020)	The Unrecorded Uses of Plants Already Documented in the Pharmacopoeia	Frequency of Citation (FC)	Relative Importance (RI)	Use Value (UV)
Actinidiaceae	Actinidia chinensis	中华猕猴桃	zhōng huá mí hóu táo	Food	Zhuang Yao (ni jiu mo) Dong	Food	Eaten directly	Fruit				0.47	0.55	0.11
Adoxaceae	Sambucus javanica	接骨草	jiē gǔ cǎo	TCM	Yao (die tang liu) Dong (mu xing)	Hemorrhoids, Traumatic injuries (Yao)/ Lower back pain (Dong)	Decocted in water or Soaked in wine for external use (Yao)/ Crushed and steeped in wine (Dong)	Whole plant (Yao)/ Leaf (Dong)				0.19	0.33	0.07
Amaranthaceae	Achyranthes bidentata	牛膝	niú xī	TCM	Zhuang	Edema/ Dysentery	Decocted in water for internal use	Whole plant		Volume 1 , P74	Dysentery	0.08	0.24	0.06
Amaranthaceae	Achyranthes longifolia	柳叶牛膝	liǔ yè niú xī	TCM/ Food	Yao (Yanzi gen) Dong (mei ao a bu )	Nourish, Dysentery, Tinea pedis, Tonify the kidney, For food (Yao)/ Toxic sore (Dong)	Stewed with Polygala fallax, pork, and chicken, Decocted in water for internal use, Triturated for external use (Yao)/ Soaked in water of washing rice for external application (Dong)	Root				0.28	0.56	0.09
Anacardiaceae	Rhus chinensis	盐肤木	yán fū mù	TCM	Yao (nong pang qie)	Remove the leech from the nasal cavity, Rhinitis	Crushed and poured into the nostrils if leeches entering the nostrils, Mashed for external use	Fruit				0.06	0.21	0.04
Apiaceae	Centella asiatica	积雪草	jī xuě cǎo	Food	Zhuang Yao	Food	Boiled into soup, Stir-fried	Leaf		Volume 1 , P296		0.36	0.46	0.10
Araceae	Pinellia ternata	半夏	bàn xià	TCM	Yao	Nausea and regurgitation	Decocted in water for internal use	Tuber		Volume 1 , P123	Same with the Pharmacopoeia	0.06	0.21	0.04
Araceae	Colocasia esculenta	芋	yù	Forage	Yao (wen miu)	Fed pigs	Chopped and cooked thoroughly	Aboveground part				0.08	0.24	0.05
Araliaceae	Hydrocotyle sibthorpioides	天胡荽	tiān hú suī	TCM/ Food	Dong (dong sin)	Gastralgia, For food	Stir-fried with eggs	Tender leaf				0.14	0.45	0.06
Asteraceae	Grangea maderaspatana	田基黄	tián jī huáng	TCM	Yao	Hepatitis	Decocted in water for internal use	Whole plant				0.08	0.24	0.05
Asteraceae	Erigeron annuus	一年蓬	yī nián péng	TCM/ Food/ Forage	Yao (ai dou fu)	Clear heat and detoxify, Feed pigs, Hypertension, For food	Blanched and made into a cold dish	Leaf	Category 1 Invasive Species (Highest Risk Level)			0.11	0.59	0.06
Asteraceae	Dichrocephala integrifolia	鱼眼草	yú yǎn cǎo	Food	Yao (yu yan jing cao)	Food	Eaten raw	Seed				0.14	0.28	0.06
Asteraceae	Bidens pilosa	鬼针草	guǐ zhēn cǎo	TCM	Zhuang Dong (mei nia)	Rheumatism (Zhuang)/ Coryza (Dong)	After dried in the sun with Erigeron canadensis, boiled in water for external use (Zhuang)/ Decocted in water for internal use (Dong)	Whole plant	Category 1 Invasive Species (Highest Risk Level)			0.22	0.35	0.08
Asteraceae	Emilia sonchifolia	一点红	yī diǎn hóng	TCM	Zhuang Yao	Dysentery, Furuncle	Decocted in water for external use	Aboveground part				0.22	0.35	0.08
Basellaceae	Anredera cordifolia	落葵薯	luò kuí shǔ	Food	Yao	Food	Eaten after Stir-fried	Leaf	Category 1 Invasive Species (Highest Risk Level)			0.08	0.24	0.05
Blechnaceae	Blechnum orientale	乌毛蕨	wū máo jué	TCM	Zhuang	Hemostasis	Chewed up and applied externally to the would	Tender leaf				0.22	0.35	0.08
Campanulaceae	Lobelia chinensis	半边莲	bàn biān lián	TCM	Zhuang Yao	Edema (Zhuang)/ Snake bite (Yao)	Decocted in water for external use (Zhuang)/ Decocted in water for internal use (Yao)	Whole plant		Volume 1 , P122	Same with the Pharmacopoeia	0.22	0.35	0.08
Commelinaceae	Murdannia triquetra	水竹叶	shuǐ zhú yè	Forage	Yao (zhu ye cao)	Fed pigs	Chopped and cooked thoroughly	Aboveground part				0.25	0.37	0.08
Iridaceae	Iris japonica	蝴蝶花	hú dié huā	TCM	Yao	Pharyngalgia with swelling, Gastralgia	Decocted in water for internal use	Flower				0.06	0.21	0.05
Juncaceae	Juncus effusus	灯心草	dēng xīn cǎo	TCM	Zhuang Yao	Diuresis, Edema (Zhuang)/ Edema, Diuresis (Yao)	Decocted in water for internal use	Aboveground part (Zhuang)/ Whole plant (Yao)		Volume 1 , P153	Edema	0.19	0.33	0.08
Lamiaceae	Scutellaria barbata	半枝莲	bàn zhī lián	TCM	Zhuang	Traumatic injuries	Pounded out the juice for external use	Aboveground part		Volume 1 , P122	Same with the Pharmacopoeia	0.06	0.21	0.04
Lamiaceae	Perilla frutescens	紫苏	zǐ sū	Food	Yao (niao you)	Food	Cooked and eaten with duck	Leaf		Volume 1 , P353, P354		0.08	0.24	0.05
Lamiaceae	Glechoma longituba	活血丹	huó xuè dān	TCM	Yao (dang qian tang)	Fever, Traumatic injuries	Stir-fried, crushed, socked in the water of washing rice and heated up on the lid of a pot, and then applied for external application or gua sha	Whole plant				0.14	0.28	0.06
Lindsaeaceae	Odontosoria chusana	乌蕨	wū jué	TCM	Zhuang	Hemostasis	Chewed up and applied externally to the would	Tender leaf				0.06	0.21	0.04
Lycopodiaceae	Lycopodium japonicum	石松	shí sōng	TCM	Dong	Rheumatism, Reduce swelling and relieve pain	Used for bath during the postpartum confinement period	Whole plant				0.14	0.28	0.06
Lygodiaceae	Lygodium microphyllum	小叶海金沙	xiǎo yè hǎi jīn shā	TCM	Zhuang Yao Dong	Rheumatism, Cutaneous pruritus with pain (Zhuang, Yao)/ The elderly have stagnation of blood circulation (Dong)	Decocted in water for internal use or triturated for external use (Zhuang, Yao)/ Decocted in water for external use (Dong)	Aboveground part				0.44	0.53	0.12
Lythraceae	Rotala rotundifolia	圆叶节节菜	yuán yè jié jié cài	TCM	Dong (gong bei)	Unspecified swelling and pain, Fever	Triturated for external use	Whole plant				0.14	0.28	0.07
Melastomataceae	Melastoma malabathricum	野牡丹	yě mǔ dān	TCM	Dong (diu tan hua)	Dysentery, Sober up	Decocted in water for internal use	Fruit				0.14	0.28	0.06
Melastomataceae	Melastoma dodecandrum	地菍	dì niè	TCM	Zhuang Yao	Traumatic injuries, Hemostasis	Triturated for external use	Tender leaf, Whole plant				0.22	0.35	0.08
Osmundaceae	Osmunda japonica	紫萁	zǐ qí	TCM	Zhuang Yao	Coryza, Dysentery (Zhuang)/ Female metrorrhagia (severe) (Yao)	Decocted in water for internal use or triturated for external use (Zhuang)/ Decocted in water for internal use (Yao)	Root, stem and Petiole, Tender leaf (Zhuang)/ Root, stem and Petiole (Yao)		Volume 1 , P356	Same with the Pharmacopoeia	0.31	0.42	0.10
Plantaginaceae	Plantago asiatica	车前	chē qián	TCM	Zhuang Yao (zhu bi cai) Dong (ma ta ku)	Traumatic injuries, Clear heat and detoxify (Zhuang)/ Traumatic injuries, Clear heat and detoxify, Diuresis (Yao)/ Clear heat and detoxify (Dong)	Triturated for external use or decocted in water for internal use (Zhuang)/ Decocted in water for internal or external use (Yao)/ Decocted in water for internal use (Dong)	Whole plant	To be observed	Volume 1 , P70	Traumatic injuries	0.61	0.67	0.13
Poaceae	Eleusine indica	牛筋草	niú jīn cǎo	TCM/ Food	Dong (nia ao shan)	Fever, For food	Decocted in water for internal use/ Cooked into soup	Whole plant				0.14	0.45	0.06
Poaceae	Imperata cylindrica	白茅	bái máo	TCM	Zhuang	Clear heat and detoxify, Diuresis	Decocted in water for internal use	Root		Volume 1 , P111	Same with the Pharmacopoeia	0.14	0.28	0.07
Polygonaceae	Polygonum capitatum	头花蓼	tóu huā liǎo	TCM	Zhuang	Traumatic injuries, Rheumatism	Crushed for external use, Decicted in water for internal use	Whole plant				0.14	0.28	0.06
Polygonaceae	Polygonum nepalense	尼泊尔蓼	ní bó ěr liǎo	Forage	Yao (you ze tao)	Fed pigs	Chopped and cooked thoroughly	Aboveground part				0.17	0.30	0.07
Polygonaceae	Fagopyrum dibotrys	金荞麦	jīn qiáo mài	TCM	Zhuang Yao	Pharyngalgia with swelling, Gastralgia, Leukorrhea (Zhuang)/ Pharyngalgia with swelling, Gastralgia (Yao)	Decocted in water for internal, Decocted in water for internal use, Decocted in water for external use (Zhuang)/ Decocted in water for internal use (Yao)	Root, stem (Zhuang)/ Root, stem (Yao)		Volume 1 , P228	Pharyngalgia with swelling, Gastralgia, Leukorrhea	0.22	0.35	0.08
Polygonaceae	Polygonum chinense	火炭母	huǒ tàn mǔ	TCM/ Forage	Yao (diu dou tao)	Fed pigs, Traumatic injuries	Chopped and cooked thoroughly, Soaked in wine and apply externally	Aboveground part, Leaf				0.22	0.52	0.08
Polygonaceae	Polygonum perfoliatum	杠板归	gāng bǎn guī	TCM	Zhuang	Cough, Dysentery	Decocted in water for internal use, Decocted in water for external use	Aboveground part		Volume 1 , P173	Same with the Pharmacopoeia	0.25	0.37	0.08
Polygonaceae	Polygonum hydropiper	水蓼	shuǐ liǎo	TCM/ Tool	Zhuang Yao (la liu) Dong (bai)	Traumatic injuries, Reduce swelling and relieve pain, Dysentery (Zhuang)/ Anesthetized fish, Fever, Traumatic injuries, Reduce swelling and relieve pain (Yao族)/ Anesthetized fish, Fever (Dong)	Triturated for external use, Decocted in water for internal use (Zhuang)/ Thrown into water after being crushed, Decocted in water for bathing, Triturated for external use (Yao)/ Chewed up for external use (Dong)	Whole plant (Zhuang)/ Leaf (Yao)/ Aboveground part (Dong)				0.61	0.67	0.14
q	Phytolacca americana	垂序商陆	chuí xù shāng lù	TCM/ Food/ Forage	Yao (wo cun liu) Dong (n bu)	Feed pigs, Edema, For food (Yao)/ Nourish, For food (Dong)	Fed pigs/ Cooked into soup or chopped up and then cooked thoroughly (Yao)/ Stewed with pig's feet (Dong)	Aboveground part, Tender stem, Leaf, (Yao)/ Root (Dong)	Category 1 Invasive Species (Highest Risk Level)			0.31	0.75	0.09
Ranunculaceae	Ranunculus sieboldii	扬子毛茛	yáng zǐ máo gèn	TCM	Zhuang	Rheumatism, Dysentery (Zhuang)	Decocted in water for internal use, Mashed and applied as juice externally	Leaf				0.19	0.33	0.08
Rosaceae	Rubus rosifolius	空心泡	kōng xīn pào	TCM	Dong (dong san yue)	Burn injury, Hemostasis	After dried in the sun, crushed and applied externally	Tender leaf				0.17	0.30	0.07
Rubiaceae	Hedyotis diffusa	白花蛇舌草	bái huā shé shé cǎo	TCM	Yao	Traumatic injuries	Decocted in water for internal use	Whole plant				0.14	0.28	0.06
Saururaceae	Houttuynia cordata	蕺菜	jí cài	TCM/ Food	Yao	Clear heat and detoxify, For food	Cold mixed	Aboveground part				0.08	0.24	0.05
Talinaceae	Talinum paniculatum	土人参	tǔ rén shēn	TCM/ Food	Yao (bu tao) Dong (mei ai)	Scalp pruritus, Nourish, For food	Decocted with rice-washing water for external use/ Cooked into soup	Root	Category 3 Invasive Species (Managed Risk)			0.28	0.56	0.10
Urticaceae	Boehmeria nivea	苎麻	zhù má	TCM/ Tool	Yao Dong (ba an)	Traumatic injuries, Hemostasis (Yao)/ Make fishing webs (Dong)	Triturated for external use, Made into a web	Whole plant (Yao)/ Bark (Dong)				0.31	0.59	0.11
Violaceae	Viola philippica	紫花地丁	zǐ huā dì dīng	TCM	Zhuang	Snake bite, Diarrhea, Dysentery	Grinded for external use	Whole plant		Volume 1 , P352	Diarrhea, Dysentery	0.19	0.33	0.07
Vitaceae	Cayratia japonica	乌蔹莓	wū liǎn méi	TCM	Zhuang	Fracture, Pulmonary tuberculosis	Crushed for external use, Decicted in water for internal use	Whole plant				0.06	0.21	0.04
Polygonaceae	Reynoutria japonica	虎杖	hǔ zhàng	TCM	Yao	Diarrhea	Decocted in water for internal use	Root		Volume 1 , P217	Diarrhea	0.11	0.26	0.06
